# Supplementary material for: Suppression of Borna Disease Virus Replication during Its Persistent Infection Using the CRISPR/Cas13b System
Source: MDPI journal article supplement (doi:10.3390/ijms25063523), 2024-03-20
Supplement: s1 [file s1]

**Table S1.** List of crRNA primers used in this study.

| Primer                          | Sequence 5' to 3'                        | Description                                               |
|---------------------------------|------------------------------------------|-----------------------------------------------------------|
| crRNA NT forward primer (#446)  | CACCGCAGGGTTTTCCAGTCACGACGTTGTAA<br>AA   | Target Control<br>(Cox, D.B.T. <i>et al.</i> , 2017) [35] |
| crRNA NT reverse primer (#447)  | CAACTTTTACAACGTCGTGACTGGGAAAACCC<br>TGC  | Target Control<br>(Cox D.B.T. <i>et al.</i> , 2017) [35]  |
| crRNA N#1 forward primer (#529) | CACCCGTGACTGGTCTAACAATGCCACTGCGTT<br>CT  | Target BoDV-1 N mRNA                                      |
| crRNA N#1 reverse primer (#530) | CAACAGAACGCAGTGGCATTGTTAGACCAGTC<br>ACG  | Target BoDV-1 N mRNA                                      |
| crRNA N#2 forward primer (#531) | CACCGAACAAACGCAGCGTGACGTCCTGGGAT<br>TAG  | Target BoDV-1 N mRNA                                      |
| crRNA N#2 reverse primer (#532) | CAACCTAATCCCAGGACTGCACGCTGCGTTTGT<br>TC  | Target BoDV-1 N mRNA                                      |
| crRNA N#3 forward primer (#448) | CACCCCGTTAATCCAATCTATAGCCTCATGTGGA<br>T  | Target BoDV-1 N mRNA                                      |
| crRNA N#3 reverse primer (#449) | CAACATCCACATGAGGCTATAGATTGGATTAAACG<br>G | Target BoDV-1 N mRNA                                      |
| crRNA N#4 forward primer (#533) | CACCACTCCTTTATAGTAGTGACGTAGTCATCT<br>G   | Target BoDV-1 N mRNA                                      |
| crRNA N#4 reverse primer (#534) | CAACCAGATGACTACGTACACTACTATAAAGGA<br>GT  | Target BoDV-1 N mRNA                                      |
| crRNA N#5 forward primer (#450) | CACCGCGCCCGGCTGGATGGTGGAGGCCCGGT<br>AGC  | Target BoDV-1 N mRNA                                      |
| crRNA N#5                       | CAACGCTACCGGGCCTCCACCATCCAGCCGGGC        | Target BoDV-1 N                                           |

|                                       |                                         |                             |
|---------------------------------------|-----------------------------------------|-----------------------------|
| reverse primer<br>(#451)              | GC                                      | mRNA                        |
| crRNA N#6<br>forward primer<br>(#535) | CACCATTATGGCAGAGATCTCACCTGAGAGCTC<br>TG | Target BoDV-1 N<br>mRNA     |
| crRNA N#6<br>reverse primer<br>(#536) | CAACCAGAGCTCTCAGGTGAGATCTCTGCCATA<br>AT | Target BoDV-1 N<br>mRNA     |
| crRNA L#1<br>forward primer<br>(#569) | CACCTAGCAAGTAATAGTCACAGGATGCCAGG<br>TTC | Target BoDV-1<br>M/G/L mRNA |
| crRNA L#1<br>reverse primer<br>(#570) | CAACGAACCTGGCATCCTGTGACTATTACTTGC<br>TA | Target BoDV-1<br>M/G/L mRNA |
| crRNA L#2<br>forward primer<br>(#470) | CACCTGAGGAGGAGAACAGGGTCAAGTTGAAG<br>CAG | Target BoDV-1<br>M/G/L mRNA |
| crRNA L#2<br>reverse primer<br>(#471) | CAACCTGCTTCAACTTGACCCTGTTCTCCTCCT<br>CA | Target BoDV-1<br>M/G/L mRNA |
| crRNA L#3<br>forward primer<br>(#571) | CACCAGTACCCGCAATTGAACATCTGATCCAAC<br>TG | Target BoDV-1<br>M/G/L mRNA |
| crRNA L#3<br>reverse primer<br>(#572) | CAACCAGTTGGATCAGATGTTCAATTGCGGGTA<br>CT | Target BoDV-1<br>M/G/L mRNA |
| crRNA L#4<br>forward primer<br>(#573) | CACCCAAGGTAAGTGCAACCTTCCAAATAAGGT<br>TG | Target BoDV-1<br>M/G/L mRNA |
| crRNA L#4<br>reverse primer<br>(#574) | CAACCAACCTTATTTGGAAGGTTGCACTTACCT<br>TG | Target BoDV-1<br>M/G/L mRNA |
| crRNA L#5<br>forward primer<br>(#575) | CACCCTTGCCAATGAGAATCCCGAGACAATAAC<br>TC | Target BoDV-1<br>M/G/L mRNA |
| crRNA L#5                             | CAACGAGTTATTGTCTCGGGATTCTCATTGGCA       | Target BoDV-1               |

|                                       |                                          |                             |
|---------------------------------------|------------------------------------------|-----------------------------|
| reverse primer<br>(#576)              | AG                                       | M/G/L mRNA                  |
| crRNA L#6<br>forward primer<br>(#577) | CACCAGGCTAACCTGAACGACTGTAAGCTCCG<br>ATA  | Target BoDV-1<br>M/G/L mRNA |
| crRNA L#6<br>reverse primer<br>(#578) | CAACTATCGGAGCTTACAGTCGTTCAAGGTTAGC<br>CT | Target BoDV-1<br>M/G/L mRNA |

**Table S2.** List of primers and probes used in this study.

| Primer                                                  | Sequence 5' to 3'                      | Description                                              |
|---------------------------------------------------------|----------------------------------------|----------------------------------------------------------|
| BoDV-1 gRNA probe (p24)                                 | FAM-AGAACCCCTCCATGATCTCAGACCCAGA-TAMRA | Real-time RT-PCR (Hayashi, Y. <i>et al.</i> , 2009) [83] |
| BoDV-1 gRNA-specific RT primer for huP2Br strain (MH49) | TGTTGCGCTAACAACAAACCAATCAC             | Real-time RT-PCR (Hayashi, Y. <i>et al.</i> , 2009) [83] |
| BoDV-1 gRNA-forward primer for huP2Br strain (OU91)     | ATGCATTGACCCAACCAGTC                   | Real-time RT-PCR (Teng, D <i>et al.</i> , 2019) [27]     |
| BoDV-1 gRNA-reverse primer for huP2Br strain (OU92)     | ATCATTCGACAGCTGCTCCCTTC                | Real-time RT-PCR (Teng, D <i>et al.</i> , 2019) [27]     |
| BoDV-1 N-forward primer (OU277)                         | GGAGCCGAGCAGATCAAGAA                   | Real-time RT-PCR (Teng, D <i>et al.</i> , 2019) [27]     |
| BoDV-1 N-reverse primer (OU278)                         | CACAAAGGAGCCTACCCAGG                   | Real-time RT-PCR (Teng, D <i>et al.</i> , 2019) [27]     |
| BoDV-1 L probe                                          | FAM-CGAGGCATCCGTGGTCAGCAGAT-TAMRA      | Real-time RT-PCR (Teng, D <i>et al.</i> , 2019) [27]     |
| BoDV-1 L-forward primer for huP2Br strain               | GGAAGCGCCCCGTGTT                       | Real-time RT-PCR (Teng, D <i>et al.</i> , 2019) [27]     |
| BoDV-1 L-reverse primer for huP2Br strain               | CCCCCACAGTGATTCGCTTA                   | Real-time RT-PCR (Teng, D <i>et al.</i> , 2019) [27]     |
| Human GAPDH-forward primer (OU67)                       | AGCGAGATCCCTCCAAAATC                   | Real-time RT-PCR (Kojima, S. <i>et al.</i> , 2014) [84]  |

|                                                |                          |                                                               |
|------------------------------------------------|--------------------------|---------------------------------------------------------------|
| Human GAPDH-<br>reverse primer<br>(OU68)       | AAATGAGCCCCAGCCTTCTC     | Real-time RT-PCR<br>(Kojima, S. <i>et al.</i> ,<br>2014) [84] |
| HPRT1- forward<br>primer<br>(HPSF-F:<br>OU383) | GGACTAATTATGGACAGGACTG   | Real-time RT-PCR<br>(Honda, T. <i>et al.</i> ,<br>2020) [85]  |
| HPRT1- reverse<br>primer<br>(HPSF-R:<br>OU384) | GCTCTTCAGTCTGATAAAATCTAC | Real-time RT-PCR<br>(Honda, T. <i>et al.</i> ,<br>2020) [85]  |
| L3MBTL1-<br>forward primer<br>(#1058)          | AGAGGGACAACCCACTGCTA     | Real-time RT-PCR<br>(Wang, Q. <i>et al.</i> ,<br>2019) [59]   |
| L3MBTL1-<br>reverse primer<br>(#1059)          | GGCCTTCTGCTCCTCTAGGT     | Real-time RT-PCR<br>(Wang, Q. <i>et al.</i> ,<br>2019) [59]   |
