# Supplementary material for: Suppression of Borna Disease Virus Replication during Its Persistent Infection Using the CRISPR/Cas13b System
Source: MDPI journal article supplement (doi:10.3390/ijms25063523), 2024-03-20
Supplement: s1 [file s1]

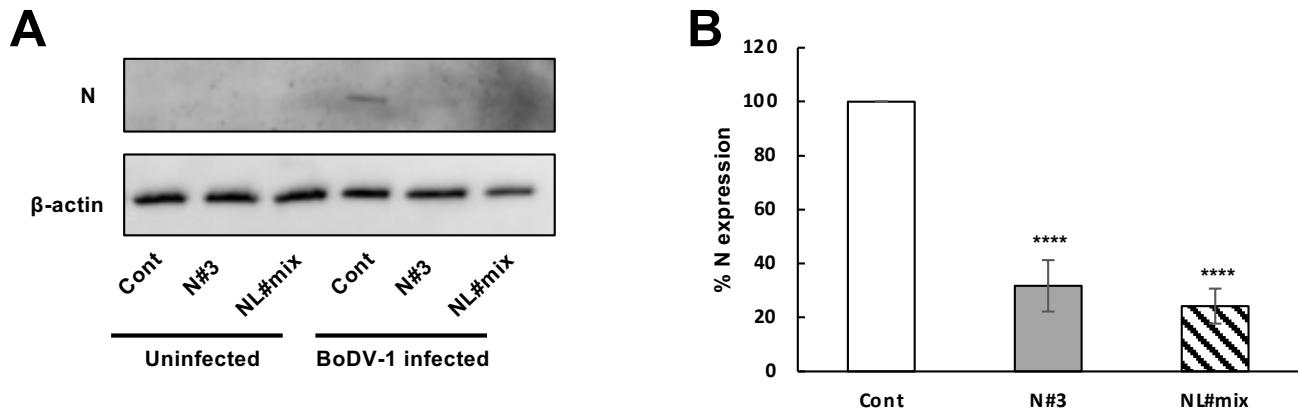

### Supplementary Figure S1.

Decrease in the BoDV-1 N proteins by the CRISPR/Cas13b system targeting the N mRNAs in de novo infection. (A) The levels of the N and the  $\beta$ -actin proteins in BoDV-1-infected 293T cells expressing Cas13b and the indicated crRNA. Uninfected 293T cells were transfected with the plasmid expressing Cas13b and the indicated crRNA. At 2 days post-transfection, the transfected cells were seeded and infected with BoDV-1/GLuc at an MOI of 0.25. At 3 days post-infection, the cell homogenates were collected. The indicated protein levels were determined by western blot analyses. (B) Quantification of the levels of the N protein in panel (A). The band intensity of the N protein in each sample was normalized with that of  $\beta$ -actin. Values are expressed as the mean  $\pm$  S.E. of at least three independent experiments. \*\*\*\*,  $P < 0.001$  (vs. Cont, a two-tailed Student's  $t$ -test).
